# Supplementary material
Source: Research Square preprint supplement (doi:10.21203/rs.3.rs-9204164/v1)
Supplement: Supplementary file 1 [file 785467dd833fe7249ee9f8eb.docx]

**STUDY QUESTIONNAIRE (Supplementary file )**

**Malaria vaccination acceptance among pregnant women in late pregnancy and postpartum: a study of awareness, perception and readiness to protect themselves and their children.**

**SECTION 1: SOCIO-DEMOGRAPHIC/CLINICAL INFORMATION**

1. Age of Respondent (in years): [ ] 15–19 [ ] 20–24 [ ] 25–29 [ ] 30–34 [ ] 35–39 [ ] 40+

2. Marital Status: [ ] Single [ ] Married [ ] Others

3. Mother’s Level of Education: [ ] No formal education [ ] Primary [ ] Secondary [ ] Tertiary [ ] Arabic education

4. Mother’s Employment Status: [ ] Self-employed [ ]Private-employment [ ] Unemployed [ ] Civil servant

5. Ethnicity: [ ] Yoruba [ ] Igbo [ ] Hausa [ ] Others (mention): ___________

6. Parity (Number of children): [ ] 0 [ ] 1–2 [ ] 3–4 [ ] 5+

7. Husband’s Level of Education: [ ] No formal [ ] Primary [ ] Secondary [ ] Tertiary

8. Husband’s Occupation: [ ] Unemployed [ ] Civil servant [ ] Private sector [ ] Self-employed

9. Gestational Age (weeks): __________________ LMP_______________

10. How many weeks after delivery: __________________

11. Have you been diagnosed with malaria in this pregnancy? [ ] Yes [ ] No

12. If yes, was malaria test done? [ ] Yes [ ] No

13. Have you received any malaria prevention in this pregnancy? [ ] Yes [ ] No

14. How many times/doses? ___________

**SECTION 2: AWARENESS OF MALARIA VACCINE**

1. Are you aware of the malaria vaccine (MV)? [ ] Yes [ ] No

2. Where did you get information about the malaria vaccine? (Tick all that apply)

[ ] Media (TV, radio, newspaper)

[ ] Internet

[ ] Family and friends

[ ] Healthcare provider

[ ] Others (specify): _______________

**SECTION 3: PERCEPTION ABOUT MALARIA VACCINE**

1. Do you believe in vaccination as a means of disease prevention? [ ] Yes [ ] No [ ] I don’t know

2. Do you believe the malaria vaccine can protect against malaria? [ ] Yes [ ] No [ ] I don’t know

3. Do you think malaria vaccination during pregnancy is necessary? [ ] Yes [ ] No [ ] I don’t know

4. Would you recommend the malaria vaccine to others? [ ] Yes [ ] No [ ] I don’t know

**SECTION 4: READINESS TO ACCEPT MALARIA VACCINE**

1. If malaria vaccination were available today, would you be willing to get vaccinated? [ ] Yes [ ] No [ ] Undecided

2. If introduced in the NPI schedule, would you be willing to vaccinate your child? [ ] Yes [ ] No [ ] Undecided

3. What would motivate you to get vaccinated against malaria? (Select all that apply)

[ ] Free vaccination

[ ] Convenient vaccination location

[ ] Recommendation from healthcare provider

[ ] Information about vaccine safety and effectiveness

[ ] Others (please specify): _______________

4. Are there any concerns/barriers that can prevent you from accepting malaria vaccine if introduced? (Select all that apply)

[ ] Doubts about effectiveness

[ ] Cost

[ ] Safety concerns

[ ] Religious/cultural beliefs

[ ] Accessibility

[ ] Lack of information

[ ] Others (please specify): _______________
